1  
2  
3  
4  
5  
6  
7  
8  
9  
10  
11  
12  
13  
14  
15  
16  
17  
18  
19  
20  
21  
22  
23

**Genome annotation of Poly(lactic acid) degrading *Pseudomonas aeruginosa* and  
*Sphingobacterium sp.***

*Sadia Mehmood Satti*<sup>a,b</sup>, *Aamer Ali Shah*<sup>a</sup>, *Rafael Auras*<sup>b</sup>, *Terence L. Marsh*<sup>e\*</sup>

a. Department of Microbiology, Faculty of Biological Sciences, Quaid-i-Azam University,  
Islamabad 45320, Pakistan.

b. School of Packaging, Michigan State University, East Lansing, MI, 48824-1223, United  
States.

c. Department of Microbiology and Molecular Genetics, Michigan State University, East  
Lansing, MI, 48824-1223, United States.

\*Corresponding Author: P: (517) 884-5391, E: [marsht@msu.edu](mailto:marsht@msu.edu)

24

## 25 **Abstract**

26 *Pseudomonas aeruginosa* and *Sphingobacterium sp.* are well known for their ability to  
27 decontaminate many environmental pollutants like PAHs, dyes, pesticides and plastics. The  
28 present study reports the annotation of genomes from *P. aeruginosa* and *Sphingobacterium sp.*  
29 that were isolated from compost, based on their ability to degrade poly(lactic acid), PLA, at  
30 mesophilic temperatures (~30°C). Draft genomes of both the strains were assembled from  
31 Illumina reads, annotated and viewed with an aim of gaining insight into the genetic elements  
32 involved in degradation of PLA. The draft-assembled genome of strain *Sphingobacterium* strain  
33 S2 was 5,604,691 bp in length with 435 contigs (maximum length of 434,971 bp) and an average  
34 G+C content of 43.5%. The assembled genome of *P. aeruginosa* strain S3 was 6,631,638 bp long  
35 with 303 contigs (maximum contig length of 659,181 bp) and an average G+C content 66.17 %.  
36 A total of 5,385 (60% with annotation) and 6,437 (80% with annotation) protein-coding genes  
37 were predicted for strains S2 and S3 respectively. Catabolic genes for biodegradation of xenobiotic  
38 and aromatic compounds were identified on both draft genomes. Both strains were found to have  
39 the genes attributable to the establishment and regulation of biofilm, with more extensive  
40 annotation for this in S3. The genome of *P. aeruginosa* S3 had the complete cascade of genes  
41 involved in the transport and utilization of lactate while *Sphingobacterium strain* S2 lacked  
42 lactate permease, consistent with its inability to grow on lactate. As a whole, our results reveal and  
43 predict the genetic elements providing both strains with the ability to degrade PLA at mesophilic  
44 temperature.

45

46 **Keywords:** *Genome sequence, biodegradation, biofilm, lactate utilization, hydrolytic enzymes*

47

## 48 **1. Introduction**

49 Poly(lactic acid) (PLA), is a bio-based aliphatic polyester polymer, obtained from sources such as  
50 corn sugar, cassava, wheat, rice, potato, and sugar cane, considered renewable [1, 2]. PLA is  
51 completely biodegradable under industrial composting conditions [3] as well as under  
52 unsupervised environmental conditions where its biodegradation is considered safe [4]. In the last  
53 two decades biodegradation of PLA has been extensively studied and many microbial species  
54 (actinomycete, bacteria, fungus) have been identified with the ability to degrade PLA [4]. Most of  
55 the reported bacterial species are from the family *Pseudonocardiaceae*, *Thermomonosporaceae*,  
56 *Micromonosporaceae*, *Streptosporangiaceae*, *Bacillaceae* and *Thermoactinomycetaceae* while  
57 the fungal species are mainly from the phylum *Basidiomycota* (*Tremellaceae*) and *Ascomycota*  
58 (*Trichocomaceae*, *Hypocreaceae*) [5-11].

59 In our previous study we also described four bacterial strains designated as S1, S2, S3 and S4, able  
60 to degrade PLA at ambient temperature [12]. Two of the isolated strains, *Sphingobacterium sp.*  
61 (S2) and *P. aeruginosa* (S3), were also evaluated for their PLA degradation in soil microcosms  
62 [13]. The genus *Sphingobacterium* is from Phylum Bacteroidetes, Family *Sphingobacteriaceae*,  
63 named with reference to the sphingolipids in their cell wall [14, 15]. They are gram-negative rods  
64 and the GC content of their DNA is usually ranging from 35 to 44 mol% [16, 17].  
65 *Sphingobacterium sp.* are found in a range of habitats like soil, forest, compost, activated sludge,  
66 rhizosphere, faeces, lakes and various food sources [18]. *Sphingobacterium* had also been reported  
67 to have their potential role in biodegradation of different pollutants including mixed plastic waste,  
68 PAHs, biodegradation of oil and pesticides [19-21]. *Pseudomonas aeruginosa* are gram-negative  
69 bacteria from  $\gamma$ -subdivision of proteobacteria. They are ubiquitously distributed in soil and aquatic

70 habitats and are well-known opportunistic pathogens [22, 23]. It has the ability to thrive in highly  
71 diverse and unusual ecological niches with scarce available nutrients. Its metabolic versatility  
72 allows it to survive on a variety of diverse carbon sources for its survival, even in some  
73 disinfectants. and can metabolize many antibiotics [24, 25]. In previous reports role of  
74 *Pseudomonas aeruginosa* in degradation of different polymers including PAHs, biodegradation of  
75 xenobiotic compounds, degradation of oil, dyes and plastics is well documented [26-30],

76  
77 PLA degrading bacteria reported in our previous study [12] were isolated from compost and had  
78 the ability to degrade PLA at ambient temperature. Interestingly, our *P. aeruginosa* strains were  
79 lactate utilizing while the *Sphingobacterium sp.* and *Chryseobacterium sp.* strains were unable to  
80 utilize lactate when provided as the sole carbon source in minimal media. We also observed that  
81 all four isolates could form biofilm on PLA. The purpose of this study was to analyze the genomes  
82 of two of our isolates and explore the genetic determinants responsible for conferring the particular  
83 characteristics to the strains promoting their degradation ability. The genes controlling lactate  
84 utilization and biofilm formation and regulation were identified. Whole genome sequence analysis  
85 for *P. aeruginosa* is extensive but such data for *Sphingobacterium sp.* is quite limited. To our  
86 knowledge this is first report that gives such genetic depth to PLA degrading bacterial strains and  
87 will provide the basis for further analysis.

88

## 89 **2. Material and methods**

### 90 **2.1 DNA extraction**

91 Two of our previously isolated, PLA degrading bacterial strains, *Sphingobacterium sp.* strain S2  
92 and *P. aeruginosa* strain S3 (GenBank accession numbers *KY432687* and *KY432688*, respectively)

93 were selected for genome sequencing [12]. Both of these strains were grown separately in 100 mL  
94 of LB in a 250 mL Erlenmeyer flask for 16 hours in a shaking incubator at 30°C and 70 rpm.  
95 Genomic DNA was subsequently isolated by using MO BIO PowerSoil® DNA isolation kit (MO  
96 BIO laboratories, Inc. Loker Ave west, Carlsbad, CA). NanoDrop® ND-1000 spectrophotometer  
97 and ND-1000 V3.1.8 software (Wilmington, DE, USA) was used to determine DNA  
98 concentrations of purified samples and sent for whole genome sequencing at Michigan State  
99 University Genomics Facility (MSU-RTSF).

100

## 101 **2.2 Genome sequencing**

102 Libraries for sequencing were prepared using the Illumina TruSeq Nano DNA Library Preparation  
103 Kit on a Perkin Elmer Sciclone NGS robot. Before sequencing, the qualities of the libraries were  
104 tested and quantification was performed using a combination of Qubit dsDNA HS, Caliper  
105 LabChip GX HS DNA and Kapa Illumina Library Quantification qPCR assays. Libraries were  
106 pooled in equimolar quantities and loaded on an Illumina MiSeq standard v2 flow cell with a  
107 2x250bp paired end format and using a v2 500 cycle reagent cartridge. Illumina Real Time  
108 Analysis (v1.18.64) was used for base calling and the output was converted to FastQ format with  
109 Illumina Bc12fastq (v1.8.4) after demultiplexing. A total of 6,304,420 reads (~3.15 GB) were  
110 obtained for strain S2 and 5,800,229 reads (~2.9GB) were obtained for strain S3.

111

## 112 **2.3 Sequence assembly, annotation and analysis**

113 Assembly of the whole genome was performed using the full Spades assembly function within  
114 PATRIC (Pathosystems Resource Integration Center) (PATRIC 3.4.9) as implemented in the  
115 *miseq* assembly option. This assembly option incorporates BayesHammer algorithms followed by

116 Spades, (Spades version 3.8.). Rast tool kit as implemented in PATRIC (PATRIC 3.4.9) was used  
117 for the annotation of contigs. The assembled contig file generated from this assembly was used as  
118 seed for the Comprehensive Genome Analysis function in PATRIC. The genomes were  
119 interrogated for the distribution of specific protein families (PGFams) using the protein family  
120 sorter tool on PATRIC. The genomes were compared to their closest reference genomes available  
121 on PATRIC to examine the strain-specific unique proteins as well as proteins common to the  
122 closest relative using the filter option in protein family sorter tool on PATRIC.

123

#### 124 **2.4 Average nucleotide identity (ANI) for species delineation**

125 Isolates were further analyzed using a whole genome based Average nucleotide identity (ANI)  
126 method to delineate the genomes to their correctly. ANI values were calculated using MiSI  
127 (microbial species identifier) tool that is publicly available at Integrated Microbial Genomes  
128 (IMG) database [31]. The algorithm used in the original method proposed by Konstantinidis and  
129 Tiedje was modified and used to determine ANI between two genomes [32]. The average of the  
130 nucleotide identity of the orthologous genes of the pair of genomes was calculated and identified  
131 as bidirectional best hits (BBHs) using a similarity search tool, NSimScan  
132 (<http://www.scidm.org/>). The ANI of one genome to other genome is defined as the sum of the %-  
133 identity times the alignment length for all best bidirectional hits, divided by the sum of the lengths  
134 of the BBH genes. This pairwise calculation is performed in both directions. The strains used for  
135 comparison were complete genomes obtained from NCBI and are as follows. For the  
136 *Spingobacterium* comparisons; *S. thalpophilum* DSM 11723 (Draft genome of 32 contigs), *S. sp.*  
137 G1-14, *S. sp.* B29, *S. multivorum* DSM 11691, *S. lactis* DSM 22361, *S. wenxiniae* DSM 22789, *S.*  
138 *mizutaii* DSM 11724 and *S. sp.* 21. For the *Pseudomonas aeruginosa* comparisons; *P. aeruginosa*

139 PSE302, *P. aeruginosa* PA96, *P. aeruginosa* PA01H20, *P. aeruginosa* DSM 50071 *P. aeruginosa*  
140 PAO1, *P. aeruginosa* PAK, *P. aeruginosa* O12 PA7, *P. aeruginosa* PA\_D25, *P. aeruginosa*  
141 PA\_D1, *P. aeruginosa* KU and *P. aeruginosa* T52373.

142

## 143 **2.5 Comparative alignments using MeDuSa and Mauve**

144 For the comparative alignment of the genomes with their reference genomes and their  
145 visualization, MeDuSa [33] was used to reduce the number of contigs through comparison with  
146 the gene order of the closest strain. This was followed by alignment with MAUVE [34] to the same  
147 reference strain to provide an estimate of alignment similarity. *P. aeruginosa* PSE305 was used  
148 as a reference for our *P. aeruginosa* S3 while *Sphingobacterium thalpophilum* DSM 11723 was  
149 selected as a reference for *Sphingobacterium sp.* S2. References were selected based on closest  
150 ANI score.

151

## 152 **3. Results and discussion**

### 153 **3.1. General Genome features of *Sphingobacterium sp.* (S2) and *P. aeruginosa* (S3)**

154 The assembly of the draft genome for strain S2 yielded 87 contigs (434971 maximum length) and  
155 a total of 5,445,390 assembled base pairs with 43.66% G+C (Table 1). The largest contig was  
156 434,944 bp. There were an estimated 4,951 CDS regions, 2,864 proteins with functional  
157 assignments and several antibiotic resistance genes. The assembled draft genome of S3 had 63  
158 contigs (658,980 maximum length) with a total of 6,509,961 assembled base pairs and was 66.26%  
159 G+C. There were an estimated 6,239 CDS regions and 4,932 proteins with functional assignments  
160 and a substantial number of putative antibiotic resistant and virulence determinants.

161

162 **Table 1. General genomic features of *Sphingobacterium* sp. S2 and *P. aeruginosa* S3**

163

| Features                             | <i>Sphingobacterium</i> S2 | <i>Pseudomonas</i> S3 | Database <sup>1</sup> |
|--------------------------------------|----------------------------|-----------------------|-----------------------|
| Contigs                              | 87                         | 63                    | PATRIC                |
| GC Content                           | 43.66                      | 66.26                 | PATRIC                |
| Plasmids                             | 0                          | 0                     | PATRIC                |
| Contig L50                           | 9                          | 8                     | PATRIC                |
| Genome Length                        | 5,445,390 bp               | 6,509,961 bp          | PATRIC                |
| Contig N50                           | 267,833                    | 273,159               | PATRIC                |
| Chromosomes                          | 0                          | 0                     | PATRIC                |
| CDS                                  | 4,951                      | 6,239                 | PATRIC                |
| tRNA                                 | 72                         | 60                    | PATRIC                |
| Repeat Regions                       | 0                          | 60                    | PATRIC                |
| rRNA                                 | 3                          | 7                     | PATRIC                |
| Hypothetical proteins                | 2,087                      | 1,307                 | PATRIC                |
| Proteins with functional assignments | 2,864                      | 4,932                 | PATRIC                |
| Proteins with EC number assignments  | 933                        | 1,287                 | PATRIC                |
| Proteins with GO assignments         | 806                        | 1,091                 | PATRIC                |
| Proteins with Pathway assignments    | 693                        | 970                   | PATRIC                |
| Antibiotic Resistance                | 0                          | 51                    | CARD                  |
| Antibiotic Resistance                | 0                          | 5                     | NDARO                 |
| Antibiotic Resistance                | 28                         | 100                   | PATRIC                |
| Drug Target                          | 0                          | 67                    | DrugBank              |
| Drug Target                          | 0                          | 10                    | TTD                   |
| Transporter                          | 2                          | 186                   | TCDB                  |
| Virulence Factor                     | 0                          | 1                     | PATRIC VF             |
| Virulence Factor                     | 0                          | 233                   | VFDB                  |
| Virulence Factor                     | 0                          | 86                    | Victors               |

164

165 **1. Database used for identifications.**

166

167 The distribution of identified genes to cell subsystems is shown in Figure 1. *Sphingobacterium*

168 S2 has more genes linked to protein processing, energy and membrane transport whereas *P.*



169 *aeruginosa* S3 has more genes linked to metabolism, stress response/defense/virulence and cell  
170 envelop.

171

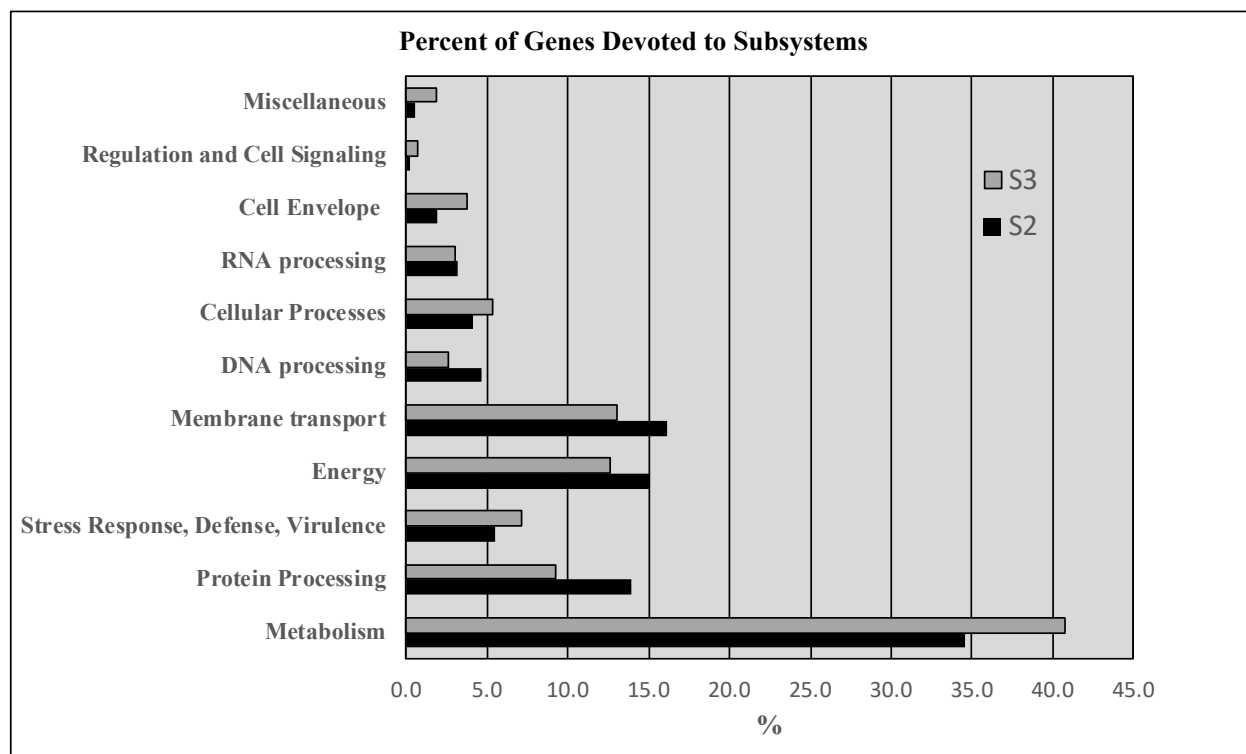

172

173 **Figure 1. Distribution of identified genes to subsystems.**

174

### 175 3.2 Genetic relatedness based on ANI

176 The average nucleotide identity (ANI) value describes the similarity between the sequences of the  
177 conserved regions of two genomes and measures the genetic relatedness between them [35]. ANI  
178 measurements are considered more informative over 16S rRNA gene identity as they are based on  
179 a larger number of genes [36]. ANI comparisons were done to explore the interspecies genetic  
180 relatedness between *Sphingobacterium sp.* strain S2 and *P. aeruginosa* strain S3 and other  
181 sequenced species from these genera. In the case of *P. aeruginosa* strain S3, Fig 1 shows a cluster  
182 was formed in the upper-right corner containing all the closely related strains with more than 98-

183 99% gene identity based on 16S rRNA sequences and 93-97%. ANI. *P. aeruginosa* PSE305  
184 showed highest ANI value and 16S rRNA gene identity of 97.69 % and 99 % respectively. Two  
185 or more strains with ANI values from 95% and above should be considered as the same species  
186 [37]. Accordingly, *P. aeruginosa* strain S3 and other strains included in the analysis belong to the  
187 same species. The results are consistent with by the phylogenetic results based on 16S rRNA gene  
188 identity as previously reported [12] but the ANI analysis indicated that our strain was closest to *P.*  
189 *aeruginosa* PSE305 rather than *P. aeruginosa* BUP2. Also, based on 16S rRNA comparative  
190 sequence analysis *P. aeruginosa* sv. O12 PA7 showed 99 % sequence similarity to *P. aeruginosa*  
191 strain S3 but had < 95 % ANI value. ANI analysis for *Sphingobacterium sp.* strain S2 showed a  
192 different clustering of sequenced strains, some of which were not the same species. The data point  
193 in the upper-right corner represents *Sphingobacterium thalpophilum* DSM11723 which showed  
194 more than 98% 16S rRNA gene similarity and 98% ANI with Strain S2 and was the closest match  
195

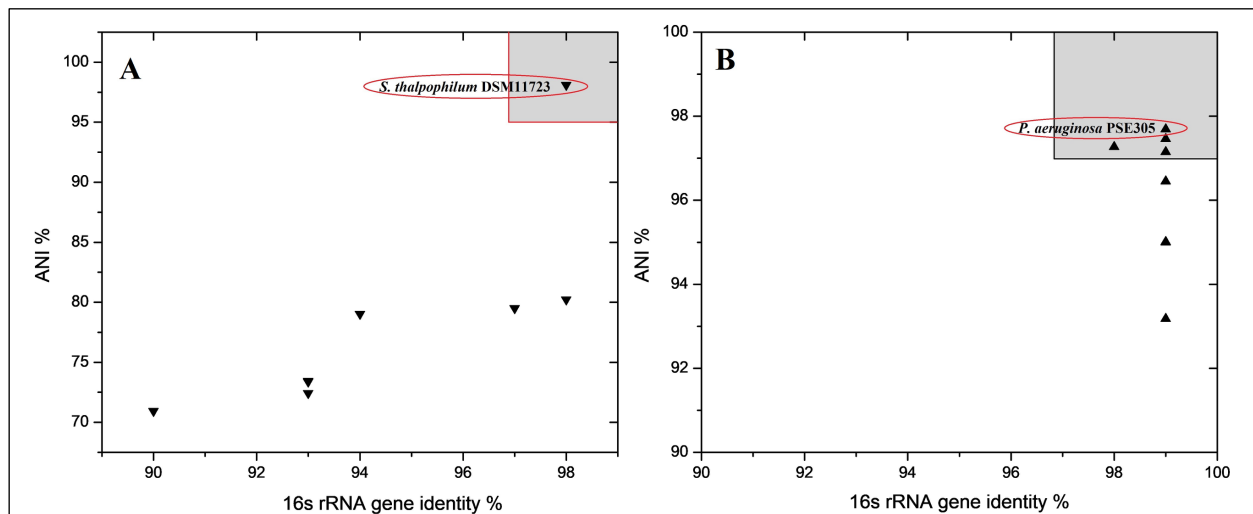

**Figure 2. Correlation between 16S rRNA gene identity and ANI for pairs of genomes. (A) *Sphingobacterium sp.* S2 and its closely related species, (B) *P. aeruginosa* S3 and its closely related species. Each triangle shows a relationship between the sequenced strains and one of its closely related species from the same genus. Reference in (A) *Sphingobacterium sp.* S2 (B) *P. aeruginosa* S3. Strains found within the grey area represents closely related species by both ANI and 16S rRNA.**

196  
197 to our strain. Two data points in the lower-right corner represented 97 and 98 % 16S rRNA gene  
198 identity but had ANI values of 79 and 80 % others having less than 95 % 16S rRNA gene  
199 identity had even lower ANI values. According to 16S rRNA gene identity and phylogenetic  
200 affiliations *Sphingobacterium sp.* strain S2 showed close resemblance to *Sphingobacterium*  
201 *thalpophilum* Y19 but ANI value showed *Sphingobacterium thalpophilum* DSM11723 to be the  
202 closest relative to our strain. Both of our *Sphingobacterium sp.* strain S2 and *P. aeruginosa* strain  
203 S3 were isolated from the compost samples, while the most closely related strains,  
204 *Sphingobacterium thalpophilum* DSM11723 and *P. aeruginosa* PSE305, were isolated from  
205 human clinical samples.

### 206 207 **3.3 MAUVE and MEDUSA alignments**

208 MAUVE and MEDUSA were used to find sequence homologies of the two isolates with the strains  
209 identified as closest in the database by ANI calculations. The alignments shown in Figure 3 were  
210 derived by first aligning the SPADE-assembled contigs against reference strains,  
211 (*Sphingobacterium thalpophilum* DSM11723 or *P. aeruginosa* PSE305) with MeDuSa (REF),  
212 followed by alignment in MAUVE using the MeDuSa ordered scaffold of isolates S2 & S3. While  
213 the closest *Sphingobacterium* genome (DSM11723) in the current IMG database was close, based  
214 on a 98.1% ANI, this was a draft sequence with 32 contigs (Fig. 3, Panel A). As a result, the  
215 MAUVE alignment shows large regions of homology but spotty consensus in terms of synteny. In  
216 contrast, our *Pseudomonas* strain was identified as *P. aeruginosa* with many finished genomes of  
217 this species in the IMG database. ANI analysis (above) indicated that *P. aeruginosa* strain PSE305  
218 was the closest. This strain has a completed genome and as a result, serves as an excellent reference  
219 strain for our isolate. Panel B of Figure 3 shows the putative alignment of *P. aeruginosa* S3 with

220 *P. aeruginosa* PSE305. The 63 contigs of the SPADE assembled strain S3 was reduced to 9 contigs  
221 after alignment against PSE305 with MeDuSa.

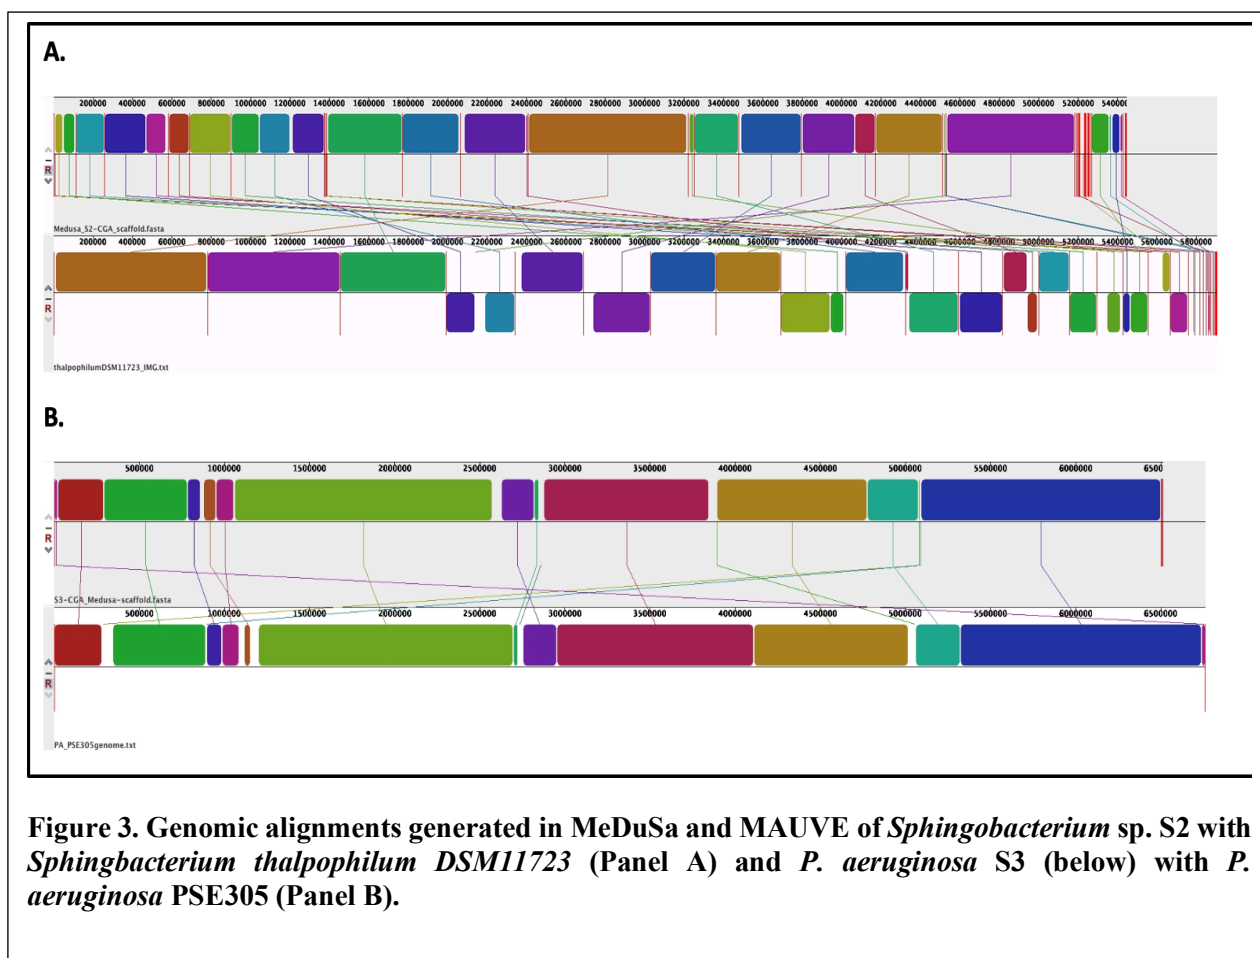

222

223

### 224 3.4 Metabolism

225 *P. aeruginosa* is a Gram-negative bacterium able to grow aerobically and anaerobically, when  
226 nitrate is available as terminal electron acceptor. It is capable of thriving in highly diverse and  
227 unusual ecological niches with low availability of nutrients. Its metabolic versatility allows it to  
228 use a variety of diverse carbon sources including certain disinfectants [38]. Moreover, it can  
229 synthesize a number of antimicrobial compounds [24, 25]. Using genome annotation through  
230 PATRIC, 1,084 ORFs in *P.aeruginosa* were assigned to metabolic pathways. Among the major

231 pathways, 361 genes were assigned to amino acid metabolism had 361 genes assigned to it and  
232 192, 286, 225 and 168 genes were assigned for energy metabolism, carbohydrate metabolism,  
233 metabolism of cofactors and vitamins and lipid metabolism, respectively. Metabolism of  
234 xenobiotics was allocated to 165 genes while 129 and 118 genes were nucleotide metabolism and  
235 biosynthesis of secondary metabolites had 129 and 118 genes assigned to their functions.

236 *Sphingobacterium spp.* are gram-negative rods, aerobic, exhibiting sliding motility and form  
237 yellow-pigmented colonies. *Sphingobacteria* have been isolated from diverse environments like  
238 soil, water, compost, deserts, blood and urine samples from human patients. A distinctive feature  
239 of *Sphingobacterium* is the presence of sphingolipids in their cell wall in high concentrations [14,  
240 39]. In *Sphingobacteria S2*, 820 ORFs were assigned metabolic functions. 212 genes were  
241 identified as participating in amino acid metabolism while 262 genes were dedicated to  
242 carbohydrate metabolism. Energy metabolism and lipid metabolism had 148 and 132 genes  
243 identified, respectively, while 67 genes were assigned to xenobiotic biodegradation and  
244 metabolism. *The disparity in assigned genes between Sphingobacterium and P. aeruginosa,*  
245 *particularly with respect to carbohydrate metabolism and amino acid synthesis* is presented in  
246 Figure 4.

247

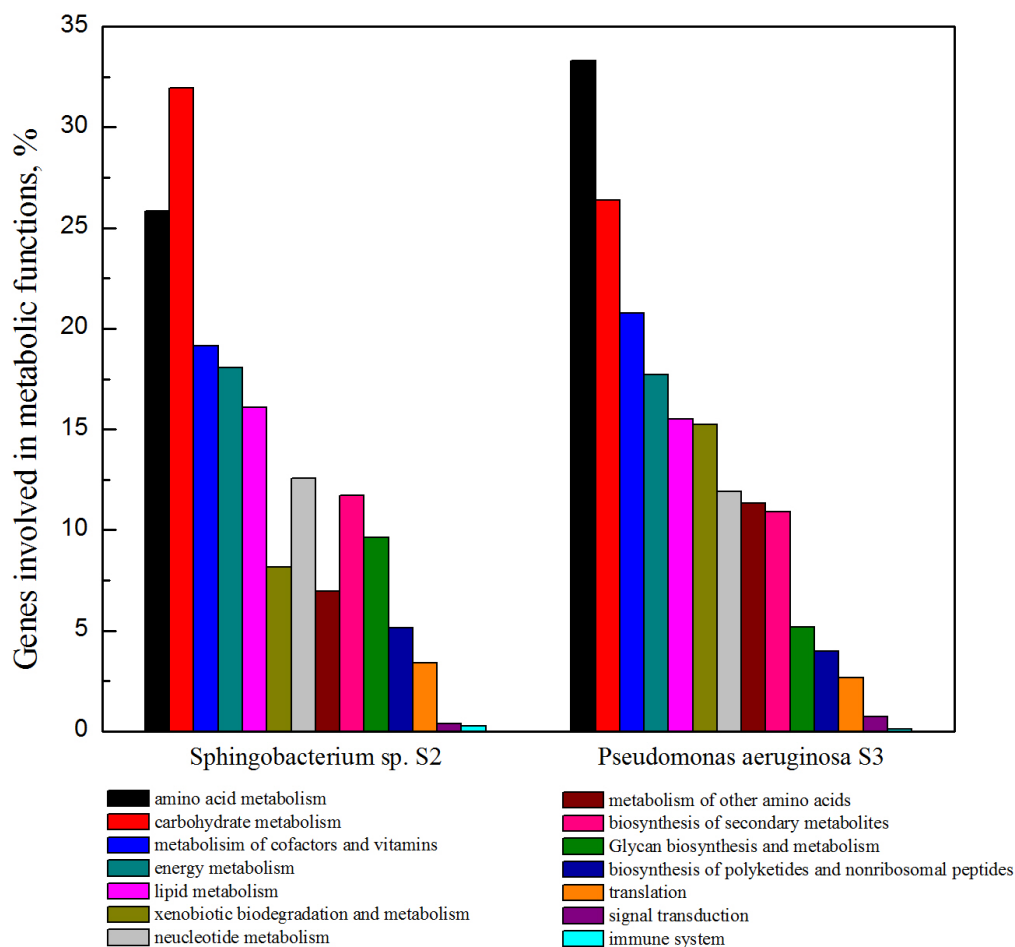

248

249 **Figure 4. Metabolic features of *P. aeruginosa* S3 and *Spingobacterium* sp. S2**

### 250 3.3. Xenobiotics biodegradation metabolism

251 In previous reports the role of *P. aeruginosa* in degradation of different polymers including  
252 PAHs, biodegradation of xenobiotic compounds, degradation of oil, dyes and plastics as well is  
253 well documented [26-30], *Spingobacterium* had also been reported to have their potential role in  
254 biodegradation of different pollutants including mixed plastic waste, PAHs, biodegradation of oil  
255 and pesticides [19-21]. Table 2 describes the major pathways and the number of genes related to  
256 biodegradation of different xenobiotic compounds in both strains S2 and S3. According to  
257 sequence analysis, several pathways for the biodegradation of xenobiotic compounds were found  
258 in both strains with twice as many detected in *P. aeruginosa* as compared to *Spingobacterium* sp.

259 *This may be due to the fact that P. aeruginosa* is more comprehensively studied compared to  
260 *Sphingobacterium sp.* Among all the degradation pathways found in both strains, the degradation  
261 of benzoate in *P. aeruginosa* had the greatest number of annotated genes Benzoate, an aromatic  
262 compound, has been widely used as a model for the study of the bacterial catabolism of aromatic  
263 compounds. In *Sphingobacterium sp.* genes associated with 1,4-Dichlorobenzene degradation  
264 were detected and this compound is a well-studied halogenated aromatic hydrocarbon [40]. Many  
265 genes related to the degradation pathway of one of the most important class of pollutants,  
266 polycyclic aromatic hydrocarbons (PAHs) like naphthalene, anthracene, 1- and 2-  
267 methylnaphthalene, was found in both strains. Among the halogenated organic compounds, 29  
268 genes were dedicated to tetrachloroethene degradation in *P. aeruginosa* S3, while 6 genes were  
269 found in *Sphingobacterium sp.* S2. For aromatic compounds and chlorinated aromatic compounds,  
270 pathways for the biodegradation of toluene, trinitrotoluene, xylene degradation, 1,4-  
271 Dichlorobenzene degradation and 2,4-Dichlorobenzoate were also found. Genes for the  
272 biodegradation of Bisphenol A, one of the most abundantly produced chemicals released into the  
273 environment and is a serious environmental pollutant, was also found in both of our strains. *P.*  
274 *aeruginosa* S3 was found to have 13 genes for bisphenol A degradation pathway[41]. Pathways  
275 for pesticides degradation like 1,1,1-Trichloro-2,2-bis(4-chlorophenyl) ethane (DDT) degradation  
276 and atrazine biodegradation were also found in both the isolates.  
277

278 **Table 2. Pathways and number of genes involved in aromatic compound metabolism in draft**  
 279 **genome sequence of *P. aeruginosa* S3 and *Sphingobacterium* sp. S2. Unique EC count refers to the**  
 280 **number of unique enzymes identified.**  
 281

| Pathway Name                                 | <i>Pseudomonas aeruginosa</i> (S3) |                 | <i>Sphingobacterium</i> sp. (S2) |                 |
|----------------------------------------------|------------------------------------|-----------------|----------------------------------|-----------------|
|                                              | Unique Gene Count                  | Unique EC Count | Unique Gene Count                | Unique EC Count |
| 1- and 2-Methylnaphthalene degradation       | 20                                 | 8               | 8                                | 6               |
| 1,4-Dichlorobenzene degradation              | 43                                 | 13              | 18                               | 6               |
| 2,4-Dichlorobenzoate degradation             | 17                                 | 9               | 7                                | 3               |
| Atrazine degradation                         | 10                                 | 2               | 7                                | 2               |
| Benzoate degradation via hydroxylation       | 60                                 | 25              | 16                               | 7               |
| Biphenyl degradation                         | 3                                  | 2               | 3                                | 2               |
| Bisphenol A degradation                      | 13                                 | 6               | 4                                | 3               |
| Caprolactam degradation                      | 21                                 | 6               | 9                                | 4               |
| Drug metabolism - cytochrome P450            | 19                                 | 3               | 3                                | 2               |
| Drug metabolism - other enzymes              | 9                                  | 9               | 8                                | 8               |
| Ethylbenzene degradation                     | 10                                 | 3               | 6                                | 3               |
| Fluorobenzoate degradation                   | 9                                  | 7               | 1                                | 1               |
| γ-Hexachlorocyclohexane degradation          | 9                                  | 6               | 2                                | 2               |
| Geraniol degradation                         | 30                                 | 9               | 9                                | 4               |
| Naphthalene and anthracene degradation       | 16                                 | 7               | 6                                | 3               |
| Styrene degradation                          | 14                                 | 7               | 2                                | 2               |
| Tetrachloroethene degradation                | 29                                 | 8               | 6                                | 4               |
| Toluene and xylene degradation               | 14                                 | 6               |                                  | 2               |
| Trinitrotoluene degradation                  | 12                                 | 4               | 10                               | 3               |
| DDT degradation                              | 5                                  | 4               | 2                                | 2               |
| Metabolism of xenobiotics by cytochrome P450 | 19                                 | 3               | 5                                | 3               |

282

283

### 284 3.4. Lactate metabolism

285 Lactate utilization as sole carbon source is a property of many bacteria, where a key step  
 286 of the process is oxidation of lactate [42-46]. Lactate dehydrogenases found in microbes are of two



287 types, NAD-dependent lactate dehydrogenases (nLDHs) and NAD-independent lactate  
288 dehydrogenases (iLDHs), also called respiratory lactate. The latter is usually considered to be the  
289 enzyme mainly responsible for metabolism of lactate as a carbon source [45]. The lactate  
290 utilization system is comprised of three main membrane bound proteins: NAD-independent L-  
291 lactate dehydrogenase (L-iLDH), NAD-independent D-lactate dehydrogenase (D-iLDH), and a  
292 lactate permease (LldP). Lactate permease, LldP is responsible to take up lactate into the cells  
293 and lactate dehydrogenases carry out the oxidation of either form of lactate to pyruvate [47,  
294 48]. In pathogenesis of some microbes role of lactate utilization has been observed [46]. Lactate  
295 utilization in pathogens not only has stimulatory effect on their growth, it also enhances synthesis  
296 of pathogenic determinants and imparts them resistance against various bactericidal mechanisms  
297 [46]. Utilization of lactate by different *Pseudomonas* strains is very well documented [44, 49-  
298 51]. In sequence analysis of our *P. aeruginosa* strain S3, a complete cascade of genes was  
299 found, encoding the machinery for lactate utilization that included a L-lactate permease, both L-  
300 lactate dehydrogenase and D-lactate dehydrogenase and a Lactate-responsive regulator LldR Table  
301 3. This strain was isolated and characterized for its potential to degrade Poly(lactic acid), one of  
302 the more promising of the bio-based and biodegradable polymers currently in the market, and its  
303 potential to utilize lactate, one of the final products of PLA degradation, as a sole carbon source  
304 was already established in our previous study [12]. Presence of the lactate utilization machinery  
305 found through genome sequencing is the confirmation of our previous findings regarding lactate  
306 utilization by *P. aeruginosa*, strain S3. It was previously described in the literature that both L-  
307 iLDH and D-iLDH are present in the single operon and are induced coordinately in all the  
308 reported *Pseudomonas* strains. Expression of both enzymes is controlled by the presence of  
309 enantiomer of lactate [48]. In previous studies, it was reported that in *P. aeruginosa* strain XMG

310 lactate utilization operon lldPDE consists of genes for lactate permease LldP, the L-lactate  
311 dehydrogenase LldD and the D-lactate dehydrogenase LldE and a nearby located lldR gene, which  
312 codes for a regulator LldR [48, 52]. In the genome analysis of our isolate *Sphingobacterium* strain  
313 S2, we found an incomplete set of genes, both L-lactate dehydrogenase and D-lactate  
314 dehydrogenase were present but no lactate permease was detected Table 3. Absence of lactate  
315 permease suggested that the strain is incapable of utilizing lactic acid as carbon source. This again  
316 confirmed our previous findings that showed that *Sphingobacterium* strain S2 did not utilize lactic  
317 acid as sole source of carbon. *Sphingobacterium* strain S2 was isolated and characterized based on  
318 its ability to degrade PLA suggesting that another degradation product of PLA was utilized for  
319 growth. Inability to grow on lactic acid had been previously reported in literature for different  
320 strains of *Sphingobacterium* [18, 53].

321

322 **Table 3. Genes for lactate metabolism in *P. aeruginosa* S3 and *Sphingobacterium* sp. S2**

| <b>Proteins for lactate utilization in <i>Pseudomonas aeruginosa</i> S3</b> |                  |                 |
|-----------------------------------------------------------------------------|------------------|-----------------|
| <b>Description</b>                                                          | <b>AA length</b> | <b>Proteins</b> |
| L-lactate permease                                                          | 560              | 1               |
| L-lactate dehydrogenase                                                     | 383              | 2               |
| D-lactate dehydratase (EC 4.2.1.130)                                        | 291              | 1               |
| D-lactate dehydrogenase (EC 1.1.1.28)                                       | 329              | 1               |
| Acetolactate synthase large subunit (EC 2.2.1.6)                            | 574              | 1               |
| Acetolactate synthase small subunit (EC 2.2.1.6)                            | 163              | 2               |
| Lactate-responsive regulator LldR, GntR family                              | 257              | 1               |
| Predicted D-lactate dehydrog., Fe-S protein, FAD/FMN-containing             | 938              | 1               |
| <b>Proteins for lactate utilization in <i>Sphingobacterium</i> sp. S2</b>   |                  |                 |
| <b>Description</b>                                                          | <b>AA length</b> | <b>Proteins</b> |
| L-lactate dehydrogenase                                                     | 389              | 1               |
| D-lactate dehydratase (EC 4.2.1.130)                                        | 145              | 2               |
| D-lactate dehydrogenase (EC 1.1.1.28)                                       | 330              | 1               |
| Acetolactate synthase large subunit (EC 2.2.1.6)                            | 606              | 1               |
| Acetolactate synthase small subunit (EC 2.2.1.6)                            | 196              | 1               |
| Fe-S protein, homolog of lactate dehydrogenase SO1521                       | 974              | 1               |
| Predicted L-lactate dehydrogenase, Fe-S oxidoreductase subunit YkgE         | 242              | 1               |
| Predicted L-lactate dehydrogenase, hypothetical protein subunit YkgG        | 215              | 1               |
| Predicted L-lactate dehydrogenase, Iron-sulfur cluster-binding subunit YkgF | 462              | 1               |

323

324 **3.5. Genetic determinants for biofilm formation and regulation**

325 In contrast to the planktonic life style, cells within a biofilm matrix are in close proximity  
 326 where secreted enzymes provide optimal returns for the population [54]. The phenomenon of  
 327 microbial biofilm formation is also related to other survival strategies like metal and antimicrobial  
 328 resistance, tolerance and bioremediation [55, 56]. Application of biofilm mediated bioremediation  
 329 has been found superior to other bioremediation strategies and is being applied in bioremediation  
 330 of different environmental pollutants [57-61]. Microorganisms that develop a biofilm and have

331 the ability to secrete polymers establishing a protective extracellular matrix, are physiologically  
332 more resilient to environmental changes, making them a logical choice for the treatment of  
333 different pollutants. These microbes use different strategies like biosorption, bioaccumulation and  
334 biomineralization to slowly degrade compounds [62].

335 Biofilm formation by *Pseudomonas* species had been well documented in literature[63]. *P.*  
336 *aeruginosa* is a remarkably adept opportunist with striking ability to develop biofilm [64]. In our  
337 previous study, we also observed biofilm formation by our isolate *P. aeruginosa* strain S3 on the  
338 surface of PLA during the process of biodegradation [12]. Phenomenon of biofilm formation on  
339 the surface of PLA had previously been reported by other authors as well [65-67].

340 In the genetic analysis of our isolate we found factors involved in the development of matrix of  
341 *P. aeruginosa* biofilm and its regulation (Table 4). The genes for three types of exopolysaccharides  
342 (EPS), previously reported as involved in construction of biofilm matrix of *P. aeruginosa*, (Pel,  
343 Psl and alginate [64, 68]) were found in our isolate. These EPS molecules form the protective  
344 matrix [69]. Psl is the primary factor in charge of the initiation and maintenance of biofilm  
345 structure by providing cell to cell and cell to surface interactions [70-73]. It also works as a  
346 signaling molecule to the successive events involved in the formation of biofilms and also acts as  
347 a defensive layer for different immune and antibiotic attacks [74]. Pel polysaccharide is a glucose-  
348 rich extracellular matrix and is involved in the formation of biofilms that are attached to the solid  
349 surfaces. It is considered to be less important compared to Psl [64, 73, 75, 76]. In *P. aeruginosa*  
350 from clinical isolates of CF patients Alginate is produced [23]. Besides its role in maintenance and  
351 protection of biofilm structure , it is essential for water and nutrient preservation [77].

352

353 **Table 4. Genetic elements detected in *P. aeruginosa* S3 and previously identified as involved in biofilm**  
 354 **formation in other strains of *P. aeruginosa***

| <b>Factors involved in Biofilm formation and regulation detected in <i>P. aeruginosa</i> S3</b> |                                                                                                   |
|-------------------------------------------------------------------------------------------------|---------------------------------------------------------------------------------------------------|
| <b>Psl polysaccharide</b>                                                                       | <b>Pseudomonas quinolone signal (PQS)</b>                                                         |
| Extracellular Matrix protein PslA                                                               | PQS biosynthesis protein PqsH, similar to FAD-dependent monooxygenases                            |
| Extracellular Matrix protein PslC                                                               | PQS biosynthesis protein PqsA, anthranilate-CoA ligase (EC 6.2.1.32)                              |
| Extracellular Matrix protein PslD                                                               | PQS biosynthesis protein PqsB, similar to 3-oxoacyl-[acyl-carrier-protein] synthase III           |
| Extracellular Matrix protein PslE                                                               | PQS biosynthesis protein PqsC, similar to 3-oxoacyl-[acyl-carrier-protein] synthase III           |
| Extracellular Matrix protein PslF                                                               | PQS biosynthesis protein PqsD, similar to 3-oxoacyl-[acyl-carrier-protein] synthase III           |
| Extracellular Matrix protein PslG                                                               | PqsE, quinolone signal response protein                                                           |
| Extracellular Matrix protein PslL                                                               | Anthranilate synthase, aminase component (EC 4.1.3.27)                                            |
| Extracellular Matrix protein PslJ                                                               | Anthranilate synthase, amidotransferase component (EC 4.1.3.27)                                   |
| Extracellular Matrix protein PslK                                                               | Multiple virulence factor regulator MvfR/PqsR                                                     |
|                                                                                                 | Putative transcriptional regulator near PqsH                                                      |
|                                                                                                 |                                                                                                   |
| <b>Pel Polysaccharide</b>                                                                       | <b>c-di-GMP</b>                                                                                   |
| Extracellular Matrix protein PelG                                                               | 3',5'-cyclic-nucleotide phosphodiesterase (EC 3.1.4.17)                                           |
| Extracellular matrix protein PelF, glycosyltransferase, group 1                                 | 5'-nucleotidase/2',3'-cyclic phosphodiesterase and related esterases                              |
| Extracellular Matrix protein PelE                                                               | Acyl carrier protein phosphodiesterase (EC 3.1.4.14)                                              |
| Extracellular Matrix protein PelD                                                               | diguanylate cyclase/phosphodiesterase (GGDEF & EAL domains) with PAS/PAC sensor(s)                |
| Extracellular Matrix protein PelC                                                               | Glycerophosphoryl diester phosphodiesterase (EC 3.1.4.46)                                         |
| Extracellular Matrix protein PelB                                                               | Phosphodiesterase/alkaline phosphatase D                                                          |
| Extracellular Matrix protein PelA                                                               | Membrane bound c-di-GMP receptor LapD                                                             |
|                                                                                                 |                                                                                                   |
| <b>Alginate</b>                                                                                 | <b>Quorum sensing systems</b>                                                                     |
| Alginate regulatory protein AlgQ                                                                | N-3-oxododecanoyl-L-homoserine lactone quorum-sensing transcriptional activator @ Transcriptional |
| Alginate regulatory protein AlgP                                                                | regulator LasR                                                                                    |
| Alginate biosynthesis protein AlgZ/FimS                                                         | N-acyl-L-homoserine lactone synthetase LasI                                                       |
| Alginate biosynthesis transcriptional regulatory protein algB                                   | N-butyryl-L-homoserine lactone quorum-sensing transcriptional activator @ Transcriptional         |
| Alginate biosynthesis protein Alg8                                                              | regulator RhIR                                                                                    |
| Alginate biosynthesis protein Alg44                                                             |                                                                                                   |
| Alginate biosynthesis protein AlgK precursor                                                    |                                                                                                   |
| Outer membrane protein AlgE                                                                     |                                                                                                   |
| Alginate biosynthesis protein AlgX                                                              |                                                                                                   |
| Alginate lyase precursor (EC 4.2.2.3)                                                           |                                                                                                   |
| Alginate biosynthesis protein AlgJ                                                              |                                                                                                   |
| Alginate o-acetyltransferase AlgF                                                               |                                                                                                   |
| Alginate biosynthesis transcriptional activator                                                 |                                                                                                   |

355  
 356 Biofilm formation is a multicellular process stimulated by both environmental signals controlled  
 357 by regulatory networks. During the biofilm formation, cells undergo many phenotypic shifts that  
 358 are regulated by a large array of genes [78]. In the genome of *P. aeruginosa* strain S3, several  
 359 regulatory factors were identified. One of these regulatory factors was the signaling molecule bis-  
 360 (3'-5')-cyclic dimeric guanosine monophosphate (c-di-GMP) which is considered as one of the

361 most significant molecular determinants in biofilm regulation [79]. A c-di-GMP molecule controls  
362 the interchange between the planktonic and biofilm-associated lifestyle of bacteria by stimulating  
363 the adhesins biosynthesis and exopolysaccharides during formation of biofilm [80]. The bacterial  
364 cell to cell communication system known as quorum sensing (QS) is involved in the maintenance  
365 of many biological processes like biofilm formation, bioluminescence, antibiotics production,  
366 virulence factor expression, competence for DNA uptake, and sporulation [81, 82].  
367 LasR/LasI, RhIR/RhII and PQS are the three quorum sensing signaling systems employed by *P.*  
368 *aeruginosa* to control biofilm formation [83, 84]. These three QS signaling system were found to  
369 be the part of the genome for our isolate.  
370 There is little information in the literature regarding the genetic elements involved in biofilm  
371 formation in *Sphingobacterium*, Genome analysis of our isolate *Sphingobacterium sp.*, strain S2  
372 showed presence of genes for Stage 0 sporulation protein YaaT. This protein is reported to be  
373 involved in the sporulation process and biofilm development [85, 86].

374

### 375 **3.6. Enzymes**

376 Biodegradation of polymers is carried out by two types of enzymes, extracellular enzymes that  
377 degrade long chain polymers into short oligomers or subunits that are subsequently carried inside  
378 the cell, and intracellular enzymes that further degrade the small transported units [87, 88].  
379 Degradation of synthetic polymers in the environment can be a slow process [89, 90]. PLA is a  
380 synthetic linear aliphatic polyester of lactic acid monomers joined together by ester linkages [3].  
381 The presence of ester bonds in its backbone make the polymer sensitive to hydrolysis, both  
382 chemically as well as enzymatically [88]. Biodegradation of polyesters is mostly carried out by  
383 esterolytic enzymes such as esterases, lipases, or proteases. Microbial carboxyl esterases:

384 classification, properties and application in biocatalysis). In the literature microbial degradation of  
 385 PLA is mainly reported by proteases, lipases, esterases and a few cutinases as well [4]. Both  
 386 *Sphingobacterium sp.* and *P. aeruginosa* had been documented before to have a role in the  
 387 degradation of different environmental pollutants such as mixed plastic waste, PAHs, oil, and dyes  
 388 and pesticides, *P. aeruginosa* has also been reported to have potential to degrade PLA nano-  
 389 composites [19, 26, 28, 91, 92]. In our previous study we characterized the degradation of PLA by  
 390 our isolates [12]. Genome annotation of both strains report presence of hydrolytic enzymes in  
 391 their genomes, putatively related to their degradation of PLA (Table 5). In the genome of *P.*  
 392 *aeruginosa* S3, 75 different types of proteases, 50 esterases and 25 different types of lipases were  
 393 detected.

394

395 **Table 5. Different type of hydrolytic enzymes found in the draft genome of *P. aeruginosa* S3 and**  
 396 ***Sphingobacterium sp.* S2**

| Type of enzymes          | <i>Pseudomonas aeruginosa</i> S3 |                     | <i>Sphingobacterium sp.</i> S2 |                     |
|--------------------------|----------------------------------|---------------------|--------------------------------|---------------------|
|                          | Common to reference genomes      | Unique to Strain S3 | Common to reference genomes    | Unique to Strain S2 |
| <b>Hydrolase</b>         | <b>123</b>                       | <b>51</b>           | <b>84</b>                      | <b>8</b>            |
| <b>Lipase</b>            | <b>20</b>                        | <b>5</b>            | <b>10</b>                      | <b>8</b>            |
| <b>Protease</b>          | <b>57</b>                        | <b>18</b>           | <b>22</b>                      | <b>14</b>           |
| <b>Esterase</b>          | <b>33</b>                        | <b>17</b>           | <b>25</b>                      | <b>5</b>            |
| <b>Phosphodiesterase</b> | <b>8</b>                         | <b>5</b>            | <b>5</b>                       | <b>4</b>            |
| <b>Oxygenase</b>         | <b>63</b>                        | <b>19</b>           | <b>7</b>                       | <b>3</b>            |
| <b>Catalase</b>          | <b>6</b>                         | <b>6</b>            | <b>2</b>                       | <b>1</b>            |
| <b>Phosphatase</b>       | <b>66</b>                        | <b>17</b>           | <b>25</b>                      | <b>13</b>           |

397

398 Similarly, in the genome of *Sphingobacterium sp.* S2 36 proteases, 30 esterases and 18 lipases  
 399 were identified. Apart from these various phosphodiesterases, oxygenases, catalases and

400 phosphatases have also been found in the genome of both isolates. Already established potential  
401 of these strains to degrade various environmental pollutants is reaffirmed by the presence of these  
402 diverse enzymes.

403

404

#### 405 **4. Conclusion**

406 The present study reports the whole genome sequence analysis of two bacterial strains *P.*  
407 *aeruginosa* S3 and *sphinogobacterium* sp. S2, isolated from the compost and having the potential  
408 to degrade poly(lactic acid), PLA, at mesophilic temperatures (~30°C). Draft genomes of both the  
409 strains were studied to gain an insight into the genetic elements that are involved in conferring  
410 different properties to the strains helping in the degradation of PLA. The catabolic genes  
411 responsible for biodegradation of different xenobiotic compounds, genes responsible for formation  
412 and regulation of biofilm, genes for transport and utilization of lactate and several enzymes  
413 predicted to be involved in the degradation of many organic pollutants were identified on the draft  
414 genomes. All these characteristics demonstrate the degradation potential of the strains against PLA  
415 observed in the previous studies by our group; importantly it gives insight into the possible  
416 enzymes involved in the degradation of the polymer.

417

#### 418 **5. Acknowledgements**

419 The authors show our gratitude to the Higher Education Commission of Pakistan (HEC) and the  
420 Government of Pakistan for providing a fellowship for S.S. through the international research  
421 support initiative program (IRSIP). We are also thankful to The Genomics Facility (MSU-RTSF)  
422 at Michigan State University (East Lansing, MI, USA) for performing whole genome sequencing  
423 for our strains.



## 424 References

- 425 1. Castro-Aguirre, E., et al., *Poly(lactic acid)—Mass production, processing, industrial applications,*  
426 *and end of life.* Advanced Drug Delivery Reviews.
- 427 2. Dorgan, J.R., et al., *Poly lactides: properties and prospects of an environmentally benign plastic*  
428 *from renewable resources.* Macromolecular Symposia, 2001. **175**(1): p. 55-66.
- 429 3. Auras, R., B. Harte, and S. Selke, *An overview of polylactides as packaging materials.*  
430 *Macromolecular Bioscience*, 2004. **4**(9): p. 835-864.
- 431 4. Qi, X., Y. Ren, and X. Wang, *New advances in the biodegradation of Poly(lactic acid).*  
432 *International Biodeterioration & Biodegradation*, 2017. **117**: p. 215-223.
- 433 5. Saadi, Z., et al., *Fungal Degradation of Poly(l-lactide) in Soil and in Compost.* *Journal of Polymers*  
434 *and the Environment*, 2012. **20**(2): p. 273-282.
- 435 6. Copinet, A., E. Legin-Copinet, and D. Erre, *Compostability of Co-Extruded Starch/Poly(Lactic Acid)*  
436 *Polymeric Material Degradation in an Activated Inert Solid Medium.* *Materials*, 2009. **2**(3): p.  
437 749.
- 438 7. Jarerat, A. and Y. Tokiwa, *Degradation of Poly(L-lactide) by a Fungus.* *Macromolecular*  
439 *Bioscience*, 2001. **1**(4): p. 136-140.
- 440 8. Masaki, K., et al., *Cutinase-like enzyme from the yeast Cryptococcus sp strain S-2 hydrolyzes*  
441 *polylactic acid and other biodegradable plastics.* *Applied and Environmental Microbiology*, 2005.  
442 **71**(11): p. 7548-7550.
- 443 9. Watanabe, M., et al., *Study on enzymatic hydrolysis of polylactic acid by endogenous*  
444 *depolymerization model.* *Macromolecular Theory and Simulations*, 2007. **16**(6): p. 619-626.
- 445 10. Karamanlioglu, M. and G.D. Robson, *The influence of biotic and abiotic factors on the rate of*  
446 *degradation of poly(lactic acid) (PLA) coupons buried in compost and soil.* *Polymer Degradation*  
447 *and Stability*, 2013. **98**(10): p. 2063-2071.
- 448 11. Jarerat, A., H. Pranamuda, and Y. Tokiwa, *Poly(L-lactide)-Degrading Activity in Various*  
449 *Actinomycetes.* *Macromolecular Bioscience*, 2002. **2**(9): p. 420-428.
- 450 12. Satti, S.M., et al., *Isolation and characterization of bacteria capable of degrading poly(lactic acid)*  
451 *at ambient temperature.* *Polymer Degradation and Stability*, 2017.
- 452 13. Satti, S.M., et al., *Biodegradation of Poly (lactic acid) in Soil Microcosms at Ambient*  
453 *Temperature: Evaluation of Natural Attenuation, Bio-augmentation and Bio-stimulation.* *Journal*  
454 *of Polymers and the Environment*, 2018: p. 1-10.
- 455 14. YABUUCHI, E., et al., *Sphingobacterium gen. nov., Sphingobacterium spiritivorum comb. nov.,*  
456 *Sphingobacterium multivorum comb. nov., Sphingobacterium mizutae sp. nov., and*  
457 *Flavobacterium indologenes sp. nov.: Glucose-Nonfermenting Gram-Negative Rods in CDC*  
458 *Groups I1K-2 and I1b.* *International Journal of Systematic and Evolutionary Microbiology*, 1983.  
459 **33**(3): p. 580-598.
- 460 15. Sreenivas, A., G. Sathyanarayana Reddy, and S. Shivaji, *Draft Genome Sequence of a*  
461 *Psychrophilic Bacterium, Sphingomonas antarcticum, Isolated from the Soils of Schirmacher*  
462 *Oasis, Antarctica.* *Genome Announcements*, 2014. **2**(5): p. e00696-14.
- 463 16. Liu, R., et al., *Sphingobacterium siyangense sp. nov., isolated from farm soil.* *Int J Syst Evol*  
464 *Microbiol*, 2008. **58**(Pt 6): p. 1458-62.
- 465 17. He, X., et al., *Sphingobacterium shayense sp. nov., isolated from forest soil.* *Int J Syst Evol*  
466 *Microbiol*, 2010. **60**(Pt 10): p. 2377-81.
- 467 18. Ahmed, I., et al., *Sphingobacterium pakistanensis sp. nov., a novel plant growth promoting*  
468 *rhizobacteria isolated from rhizosphere of Vigna mungo.* *Antonie Van Leeuwenhoek*, 2014.  
469 **105**(2): p. 325-33.

- 470 19. Abraham, J. and S. Silambarasan, *Biodegradation of chlorpyrifos and its hydrolyzing metabolite*  
471 *3,5,6-trichloro-2-pyridinol by Sphingobacterium sp JAS3*. Process Biochemistry, 2013. **48**(10): p.  
472 1559-1564.
- 473 20. Noparat, P., S. Maneerat, and A. Saimmai, *Application of Biosurfactant from Sphingobacterium*  
474 *spiritivorum AS43 in the Biodegradation of Used Lubricating Oil*. Applied Biochemistry and  
475 Biotechnology, 2014. **172**(8): p. 3949-3963.
- 476 21. Haiyan, R., et al., *Degradation characteristics and metabolic pathway of 17alpha-*  
477 *ethynylestradiol by Sphingobacterium sp. JCR5*. Chemosphere, 2007. **66**(2): p. 340-6.
- 478 22. Silver, S., *Pseudomonas aeruginosa* as an opportunistic pathogen. Trends in  
479 Microbiology. **2**(1): p. 33.
- 480 23. Govan, J.R. and V. Deretic, *Microbial pathogenesis in cystic fibrosis: mucoid Pseudomonas*  
481 *aeruginosa and Burkholderia cepacia*. Microbiol Rev, 1996. **60**(3): p. 539-74.
- 482 24. Kung, V.L., E.A. Ozer, and A.R. Hauser, *The accessory genome of Pseudomonas aeruginosa*.  
483 Microbiol Mol Biol Rev, 2010. **74**(4): p. 621-41.
- 484 25. Bodey, G.P., et al., *Infections caused by Pseudomonas aeruginosa*. Rev Infect Dis, 1983. **5**(2): p.  
485 279-313.
- 486 26. Nachiyar, C.V. and G.S. Rajkumar, *Degradation of a tannery and textile dye, Navitan Fast Blue*  
487 *S5R by Pseudomonas aeruginosa*. World Journal of Microbiology and Biotechnology, 2003.  
488 **19**(6): p. 609-614.
- 489 27. Howard, G.T., *Biodegradation of polyurethane: a review*. International Biodeterioration &  
490 Biodegradation, 2002. **49**(4): p. 245-252.
- 491 28. Das, D., et al., *Complete genome sequence analysis of Pseudomonas aeruginosa N002 reveals its*  
492 *genetic adaptation for crude oil degradation*. Genomics, 2015. **105**(3): p. 182-190.
- 493 29. Das, N. and P. Chandran, *Microbial Degradation of Petroleum Hydrocarbon Contaminants: An*  
494 *Overview*. Biotechnology Research International, 2011. **2011**.
- 495 30. Kahraman, H. and H. Geckil, *Degradation of Benzene, Toluene and Xylene by Pseudomonas*  
496 *aeruginosa Engineered with the Vitreoscilla Hemoglobin Gene*. Engineering in Life Sciences,  
497 2005. **5**(4): p. 363-368.
- 498 31. Markowitz, V.M., et al., *IMG: the Integrated Microbial Genomes database and comparative*  
499 *analysis system*. Nucleic Acids Res, 2012. **40**(Database issue): p. D115-22.
- 500 32. Konstantinidis, K.T. and J.M. Tiedje, *Genomic insights that advance the species definition for*  
501 *prokaryotes*. Proc Natl Acad Sci U S A, 2005. **102**(7): p. 2567-72.
- 502 33. Bosi, E., et al., *MeDuSa: a multi-draft based scaffolder*. Bioinformatics, 2015. **31**(15): p. 2443-  
503 2451.
- 504 34. Darling, A.E., B. Mau, and N.T. Perna, *progressiveMauve: multiple genome alignment with gene*  
505 *gain, loss and rearrangement*. PloS one, 2010. **5**(6): p. e11147.
- 506 35. Qin, Q.-L., et al., *Comparative genomics of the marine bacterial genus Glaciecola reveals the high*  
507 *degree of genomic diversity and genomic characteristic for cold adaptation*. Environmental  
508 Microbiology, 2014. **16**(6): p. 1642-1653.
- 509 36. Rodriguez, R.L., et al., *How much do rRNA gene surveys underestimate extant bacterial diversity?*  
510 Appl Environ Microbiol, 2018.
- 511 37. Richter, M. and R. Rossello-Mora, *Shifting the genomic gold standard for the prokaryotic species*  
512 *definition*. Proc Natl Acad Sci U S A, 2009. **106**(45): p. 19126-31.
- 513 38. Sagripanti, J.L. and A. Bonifacino, *Resistance of Pseudomonas aeruginosa to liquid disinfectants*  
514 *on contaminated surfaces before formation of biofilms*. J AOAC Int, 2000. **83**(6): p. 1415-22.
- 515 39. Naka, T., et al., *Structural analysis of sphingophospholipids derived from Sphingobacterium*  
516 *spiritivorum, the type species of genus Sphingobacterium*. Biochim Biophys Acta, 2003. **1635**(2-  
517 3): p. 83-92.

- 518 40. Carmona, M., et al., *Anaerobic catabolism of aromatic compounds: a genetic and genomic view*.  
519 Microbiol Mol Biol Rev, 2009. **73**(1): p. 71-133.
- 520 41. Eio, E.J., et al., *Biodegradation of bisphenol A by bacterial consortia*. International  
521 Biodeterioration & Biodegradation, 2014. **96**: p. 166-173.
- 522 42. Erwin, A.L. and E.C. Gotschlich, *Oxidation of D-lactate and L-lactate by Neisseria meningitidis:*  
523 *purification and cloning of meningococcal D-lactate dehydrogenase*. Journal of Bacteriology,  
524 1993. **175**(20): p. 6382-6391.
- 525 43. Gibello, A., et al., *Cloning and Analysis of the L-Lactate Utilization Genes from Streptococcus*  
526 *iniae*. Applied and Environmental Microbiology, 1999. **65**(10): p. 4346-4350.
- 527 44. Ma, C., et al., *Membrane-bound L- and D-lactate dehydrogenase activities of a newly isolated*  
528 *Pseudomonas stutzeri strain*. Appl Microbiol Biotechnol, 2007. **77**(1): p. 91-8.
- 529 45. Garvie, E.I., *Bacterial lactate dehydrogenases*. Microbiological Reviews, 1980. **44**(1): p. 106-139.
- 530 46. Jiang, T., et al., *Microbial lactate utilization: enzymes, pathogenesis, and regulation*. Trends in  
531 Microbiology, 2014. **22**(10): p. 589-599.
- 532 47. Nunez, M.F., et al., *Transport of L-Lactate, D-Lactate, and glycolate by the LldP and GlcA*  
533 *membrane carriers of Escherichia coli*. Biochem Biophys Res Commun, 2002. **290**(2): p. 824-9.
- 534 48. Gao, C., et al., *Lactate Utilization Is Regulated by the FadR-Type Regulator LldR in Pseudomonas*  
535 *aeruginosa*. Journal of Bacteriology, 2012. **194**(10): p. 2687-2692.
- 536 49. Brown, P.R. and R. Tata, *Glycollate inhibition of growth of Pseudomonas aeruginosa on lactate*  
537 *medium*. J Gen Microbiol, 1987. **133**(6): p. 1521-6.
- 538 50. Gao, C., et al., *Lactate utilization is regulated by the FadR-type regulator LldR in Pseudomonas*  
539 *aeruginosa*. J Bacteriol, 2012. **194**(10): p. 2687-92.
- 540 51. O'Brien, R.W., *Metabolism of D- and L-lactate by Pseudomonas putida*. Aust J Biol Sci, 1977.  
541 **30**(6): p. 553-8.
- 542 52. Kemp, M.B., *D- and L-lactate dehydrogenases of Pseudomonas aeruginosa*. Biochemical Journal,  
543 1972. **130**(1): p. 307-309.
- 544 53. Liu, J., et al., *Sphingobacterium nematocida sp nov., a nematocidal endophytic bacterium isolated*  
545 *from tobacco*. International Journal of Systematic and Evolutionary Microbiology, 2012. **62**: p.  
546 1809-1813.
- 547 54. Jefferson, K.K., *What drives bacteria to produce a biofilm?* FEMS Microbiol Lett, 2004. **236**(2): p.  
548 163-73.
- 549 55. Harrison, J.J., H. Ceri, and R.J. Turner, *Multimetal resistance and tolerance in microbial biofilms*.  
550 Nat Rev Microbiol, 2007. **5**(12): p. 928-38.
- 551 56. Pal, A. and A.K. Paul, *Microbial extracellular polymeric substances: central elements in heavy*  
552 *metal bioremediation*. Indian Journal of Microbiology, 2008. **48**(1): p. 49-64.
- 553 57. Singh, R., D. Paul, and R.K. Jain, *Biofilms: implications in bioremediation*. Trends Microbiol, 2006.  
554 **14**(9): p. 389-97.
- 555 58. Decho, A.W., *Microbial biofilms in intertidal systems: an overview*. Continental Shelf Research,  
556 2000. **20**(10-11): p. 1257-1273.
- 557 59. Mangwani, N., et al., *Characterization of Stenotrophomonas acidaminiphila NCW-702 biofilm for*  
558 *implication in the degradation of polycyclic aromatic hydrocarbons*. J Appl Microbiol, 2014.  
559 **117**(4): p. 1012-24.
- 560 60. *Bioremediation Potential of Mercury by Bacillus Species Isolated from Marine Environment and*  
561 *Wastes of Steel Industry*. Bioremediation Journal, 2014. **18**(3): p. 204-212.
- 562 61. Shimada, K., et al., *Efficacy of forming biofilms by naphthalene degrading Pseudomonas stutzeri*  
563 *T102 toward bioremediation technology and its molecular mechanisms*. Chemosphere, 2012.  
564 **87**(3): p. 226-233.

- 565 62. Barkay, T. and J. Schaefer, *Metal and radionuclide bioremediation: issues, considerations and*  
566 *potentials*. Curr Opin Microbiol, 2001. **4**(3): p. 318-23.
- 567 63. Kyaw, B.M., et al., *Biodegradation of Low Density Polythene (LDPE) by Pseudomonas Species*.  
568 Indian Journal of Microbiology, 2012. **52**(3): p. 411-419.
- 569 64. Ryder, C., M. Byrd, and D.J. Wozniak, *Role of polysaccharides in Pseudomonas aeruginosa biofilm*  
570 *development*. Current opinion in microbiology, 2007. **10**(6): p. 644-648.
- 571 65. Richert, A., M. Walczak, and M.S. Brzezinska, *The influence of modified polyhexamethylene*  
572 *guanidine PHMG on the biodegradation of polylactide*. International Biodeterioration &  
573 Biodegradation, 2013. **84**: p. 97-103.
- 574 66. Richert, A. and M. Walczak, *Effect of polyhexamethyleneguanidine derivatives on melt flow rate*  
575 *and susceptibility to biodegradation of polylactide composites*. Przemysl Chemiczny, 2012. **91**(8):  
576 p. 1617-1620.
- 577 67. Walczak, M., et al., *Biofilm formation on the surface of polylactide during its biodegradation in*  
578 *different environments*. Colloids and Surfaces B-Biointerfaces, 2015. **136**: p. 340-345.
- 579 68. Ghafoor, A., I.D. Hay, and B.H. Rehm, *Role of exopolysaccharides in Pseudomonas aeruginosa*  
580 *biofilm formation and architecture*. Appl Environ Microbiol, 2011. **77**(15): p. 5238-46.
- 581 69. Parsek, M.R. and P.K. Singh, *Bacterial biofilms: an emerging link to disease pathogenesis*. Annu  
582 Rev Microbiol, 2003. **57**: p. 677-701.
- 583 70. Ma, L., et al., *Assembly and Development of the Pseudomonas aeruginosa Biofilm Matrix*. PLoS  
584 Pathogens, 2009. **5**(3): p. e1000354.
- 585 71. Ma, L., et al., *Pseudomonas aeruginosa Psl Is a Galactose- and Mannose-Rich Exopolysaccharide*.  
586 Journal of Bacteriology, 2007. **189**(22): p. 8353-8356.
- 587 72. Ma, L., et al., *Analysis of Pseudomonas aeruginosa conditional psl variants reveals roles for the*  
588 *psl polysaccharide in adhesion and maintaining biofilm structure postattachment*. J Bacteriol,  
589 2006. **188**(23): p. 8213-21.
- 590 73. Yang, L., et al., *Distinct roles of extracellular polymeric substances in Pseudomonas aeruginosa*  
591 *biofilm development*. Environ Microbiol, 2011. **13**(7): p. 1705-17.
- 592 74. Wei, Q. and L.Z. Ma, *Biofilm matrix and its regulation in Pseudomonas aeruginosa*. Int J Mol Sci,  
593 2013. **14**(10): p. 20983-1005.
- 594 75. Friedman, L. and R. Kolter, *Two genetic loci produce distinct carbohydrate-rich structural*  
595 *components of the Pseudomonas aeruginosa biofilm matrix*. J Bacteriol, 2004. **186**(14): p. 4457-  
596 65.
- 597 76. Friedman, L. and R. Kolter, *Genes involved in matrix formation in Pseudomonas aeruginosa PA14*  
598 *biofilms*. Mol Microbiol, 2004. **51**(3): p. 675-90.
- 599 77. Sutherland, I., *Biofilm exopolysaccharides: a strong and sticky framework*. Microbiology, 2001.  
600 **147**(Pt 1): p. 3-9.
- 601 78. Whiteley, M., et al., *Gene expression in Pseudomonas aeruginosa biofilms*. Nature, 2001.  
602 **413**(6858): p. 860-4.
- 603 79. Hengge, R., *Principles of c-di-GMP signalling in bacteria*. Nat Rev Microbiol, 2009. **7**(4): p. 263-  
604 73.
- 605 80. Wu, Y., et al., *Comparative genome analysis reveals genetic adaptation to versatile*  
606 *environmental conditions and importance of biofilm lifestyle in Comamonas testosteroni*.  
607 Applied Microbiology and Biotechnology, 2015. **99**(8): p. 3519-3532.
- 608 81. Fuqua, C., S.C. Winans, and E.P. Greenberg, *Census and consensus in bacterial ecosystems: the*  
609 *LuxR-LuxI family of quorum-sensing transcriptional regulators*. Annu Rev Microbiol, 1996. **50**: p.  
610 727-51.
- 611 82. Waters, C.M. and B.L. Bassler, *Quorum sensing: cell-to-cell communication in bacteria*. Annu Rev  
612 Cell Dev Biol, 2005. **21**: p. 319-46.

- 613 83. Schuster, M. and E.P. Greenberg, *A network of networks: quorum-sensing gene regulation in*  
614 *Pseudomonas aeruginosa*. Int J Med Microbiol, 2006. **296**(2-3): p. 73-81.
- 615 84. Venturi, V., *Regulation of quorum sensing in Pseudomonas*. FEMS Microbiol Rev, 2006. **30**(2): p.  
616 274-91.
- 617 85. Carabetta, V.J., et al., *A complex of YlbF, YmcA and YaaT regulates sporulation, competence and*  
618 *biofilm formation by accelerating the phosphorylation of Spo0A*. Mol Microbiol, 2013. **88**(2): p.  
619 283-300.
- 620 86. Hosoya, S., et al., *Mutation in yaaT leads to significant inhibition of phosphorelay during*  
621 *sporulation in Bacillus subtilis*. J Bacteriol, 2002. **184**(20): p. 5545-53.
- 622 87. Gu, J.D., *Microbiological deterioration and degradation of synthetic polymeric materials: recent*  
623 *research advances*. Int Biodeterior Biodegrad, 2003. **52**.
- 624 88. Shah, A.A., et al., *Biological degradation of plastics: a comprehensive review*. Biotechnol Adv,  
625 2008. **26**.
- 626 89. Albertsson, A.C., *The shape of the biodegradation curve for low and high density polyethenes in*  
627 *prolonged series of experiments*. European Polymer Journal, 1980. **16**(7): p. 623-630.
- 628 90. Albertsson, A.C., C. Barenstedt, and S. Karlsson, *Abiotic degradation products from enhanced*  
629 *environmentally degradable polyethylene*. Acta Polymerica, 1994. **45**(2): p. 97-103.
- 630 91. Muenmee, S., W. Chiemchaisri, and C. Chiemchaisri, *Microbial consortium involving biological*  
631 *methane oxidation in relation to the biodegradation of waste plastics in a solid waste disposal*  
632 *open dump site*. International Biodeterioration & Biodegradation, 2015. **102**: p. 172-181.
- 633 92. Shimpi, N., et al., *Biodegradation of polystyrene (PS)-poly(lactic acid) (PLA) nanocomposites*  
634 *using Pseudomonas aeruginosa*. Macromolecular Research, 2012. **20**(2): p. 181-187.

635

636

637

638
